# Supplementary material for: Resilience of BST-2/Tetherin structure to single amino acid substitutions
Source: PeerJ journal article supplement (doi:10.7717/peerj.7043), 2019-05-31
Supplement: Supplemental_Figure_2.pdf [file Supplemental_Figure_2.pdf]

## Supplemental Figure 2

for Resilience of BST-2/Tetherin structure to single amino acid substitutions

by Ian R. Roy, Camden K. Sutton, and Christopher E. Berndsen

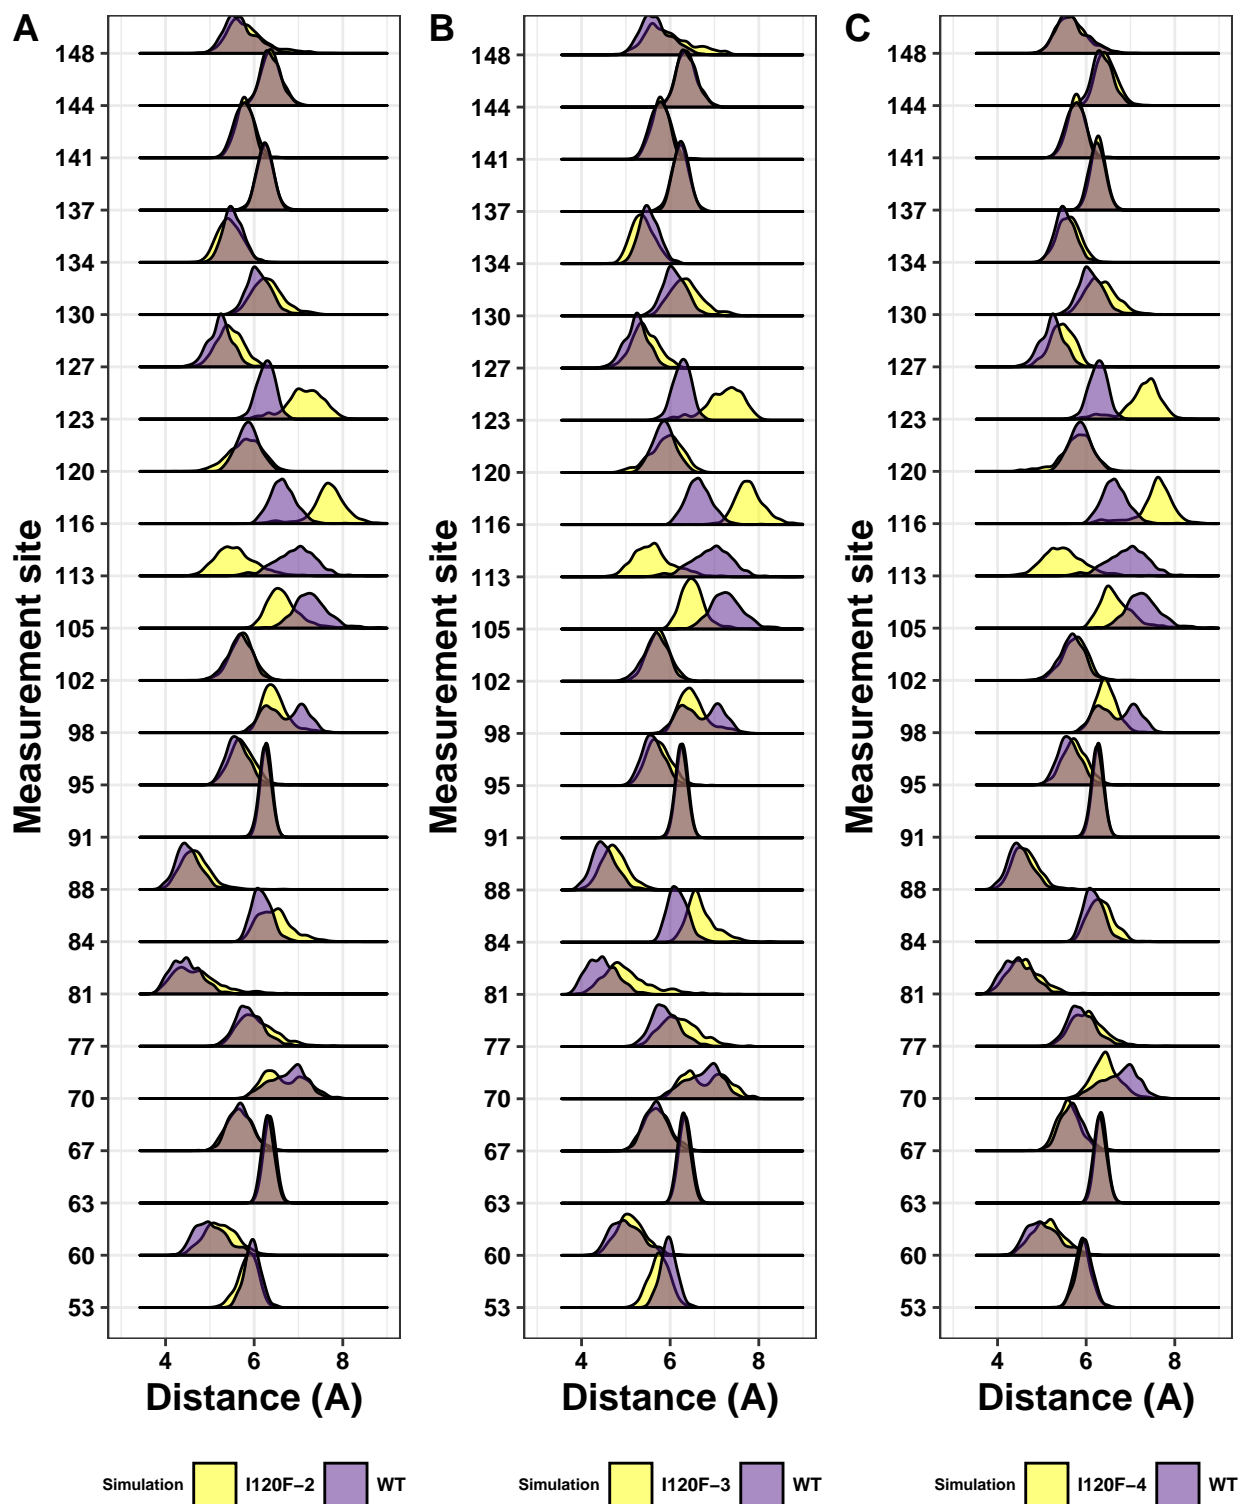

Figure 2: Differences in side chain position between the wild-type Isoleucine (purple) and the mutation Phenylalanine (yellow) for the 3 replicate simulations. Ile120Phe simulation (yellow) and the wild-type simulation (purple). Overlap is shown in grey
